# Supplementary material for: Political Ideologies, Government Trust, and COVID-19 Vaccine Hesitancy in South Korea: A Cross-Sectional Survey
Source: MDPI journal article supplement (doi:10.3390/ijerph182010655), 2021-10-12
Supplement: s1 [file s1]

## Number of elements in the Supplementary File: 1

Supplementary file S1

**Table S1.** Survey details

| Period                  | Number of<br>Eligible Cases | Number of<br>Contacted<br>Respondents | Number of<br>Respondents<br>Interviewed<br>Successfully | CON2*<br>(%) | COOP2*<br>(%) | RR3*<br>(%) |
|-------------------------|-----------------------------|---------------------------------------|---------------------------------------------------------|--------------|---------------|-------------|
| February 16–18,<br>2021 | 20,054                      | 6,840                                 | 1,000                                                   | 62.5         | 15.6          | 9.8         |

These surveys did not allow for a partial interview.

\* Contact Rate 2 (CON2), Cooperation Rate 2 (COOP2), and Response Rate 3 (RR3) were calculated according to the American Association for Public Opinion Research (AAPOR) criterion.
